# Supplementary material for: Ethnic differences in risk factors for obesity in New Zealand infants
Source: J Epidemiol Community Health. 2015 Mar 20;69(6):516–22. doi: 10.1136/jech-2014-204464 (PMC4453486; doi:10.1136/jech-2014-204464)
Supplement: Web supplement [file jech-2014-204464-s1.pdf]

## ONLINE-ONLY SUPPLEMENTARY MATERIAL

### **Ethnic differences in risk factors for obesity in New Zealand infants**

Laura D Howe<sup>\*1,2,3</sup>, Lis Ellison-Loschmann<sup>3</sup>, Neil Pearce<sup>3,4</sup>, Jeroen Douwes<sup>3</sup>, Mona Jeffreys<sup>2</sup>, Ridvan Firestone<sup>3</sup>

1 - MRC Integrative Epidemiology Unit at the University of Bristol, University of Bristol, Bristol, UK

2 - School of Social and Community Medicine, University of Bristol, Bristol, UK

3 - Centre for Public Health Research, Massey University, Wellington, New Zealand

4 - London School of Hygiene and Tropical Medicine, London, UK

\* Corresponding author. MRC Integrative Epidemiology Unit at the University of Bristol, Oakfield House, Oakfield Grove, Bristol BS8 2BN, UK. Email: [laura.howe@bristol.ac.uk](mailto:laura.howe@bristol.ac.uk)

**Supplementary Table 1. Distributions of variables in the observed and imputed data.**  
Values are % or mean (SD)

|                                                         | Imputed data | Observed data |             |
|---------------------------------------------------------|--------------|---------------|-------------|
|                                                         |              | N             |             |
| <b>Socio-demographic variables</b>                      |              |               |             |
| Child's ethnicity                                       |              |               |             |
| <i>European</i>                                         | 71.8%        | 687           | 71.8%       |
| <i>Māori or Pacific</i>                                 | 16.7%        |               | 16.7%       |
| <i>Other</i>                                            | 11.5%        |               | 11.5%       |
| Mother educated to less than degree level               | 15.8%        | 544           | 15.1%       |
| Mother's age                                            |              |               |             |
| <25 years                                               | 9.1%         | 545           | 7.9%        |
| 25 to <35 years                                         | 63.3%        |               | 64.6%       |
| ≥ 35 years                                              | 27.7%        |               | 27.5%       |
| NZ Deprivation Index 2006                               |              |               |             |
| 1 ( <i>lowest deprivation</i> )                         | 25.9%        | 544           | 26.1%       |
| 2                                                       | 28.2%        |               | 27.9%       |
| 3                                                       | 19.5%        |               | 19.5%       |
| 4                                                       | 16.7%        |               | 16.9%       |
| 5 ( <i>highest deprivation</i> )                        | 9.7%         |               | 9.6%        |
|                                                         |              |               |             |
| <b>Maternal, pregnancy and delivery characteristics</b> |              |               |             |
| Maternal pre-pregnancy BMI                              |              |               |             |
| <25 kg/m <sup>2</sup>                                   | 57.8%        | 529           | 58.2%       |
| 25 to <30 kg/m <sup>2</sup>                             | 27.3%        |               | 27.2%       |
| ≥30 kg/m <sup>2</sup>                                   | 15.0%        |               | 14.6%       |
| Mother did physical activity pre-pregnancy              | 82.9%        | 543           | 83.4%       |
| Mother's diet in pregnancy*                             |              |               |             |
| <i>Processed foods (SD)</i>                             | 0.0 (1.0)    | 927           | 0.0 (1.00)  |
| <i>Snacks (SD)</i>                                      | 0.0 (1.0)    | 927           | 0.0 (1.00)  |
| <i>Healthy foods (SD)</i>                               | 0.0 (1.0)    | 927           | 0.0 (1.00)  |
| <i>Sweet foods (SD)</i>                                 | 0.0 (1.0)    | 927           | 0.0 (1.00)  |
| <i>Starchy foods (SD)</i>                               | 0.0 (1.0)    | 927           | 0.0 (1.00)  |
| Hypertension in pregnancy                               | 12.8%        | 685           | 12.9%       |
| Diabetes in pregnancy                                   | 3.8%         | 685           | 3.8%        |
|                                                         |              |               |             |
| <b>Infancy characteristics</b>                          |              |               |             |
| Child's weight in first week (kg)                       | 3.52 (0.58)  | 671           | 3.52 (0.58) |
| Child's weight at 3 months (kg)                         | 6.06 (0.89)  | 636           | 6.05 (0.89) |
| Exclusive breastfeeding in first 3 days                 | 79.7%        | 677           | 80.2%       |
| Exclusive breastfeeding at 3 months                     | 53.2%        | 684           | 53.2%       |
| Solid foods introduced by 3 months                      | 30.0%        | 682           | 30.1%       |

\* Dietary pattern scores are standardised to have a mean of zero and variance of one; values in this table can therefore be interpreted as standard deviations from the overall population mean

**Supplementary Table 2. Characteristics of participants.** Values are mean (SD) or number (%)

|                                                         | Participants with data on all variables<br>N=422 | Participants not included in complete case analysis due to missing data on one or more variables |              | P value* |
|---------------------------------------------------------|--------------------------------------------------|--------------------------------------------------------------------------------------------------|--------------|----------|
|                                                         |                                                  | % with missing data on this variable                                                             |              |          |
| <b>Socio-demographic variables</b>                      |                                                  |                                                                                                  |              |          |
| Child's ethnicity                                       |                                                  |                                                                                                  |              |          |
| <i>European</i>                                         | 307 (72.8%)                                      | 22%                                                                                              | 186 (70.2%)  |          |
| <i>Māori or Pacific</i>                                 | 64 (15.2%)                                       |                                                                                                  | 51 (19.3%)   |          |
| <i>Other</i>                                            | 51 (12.1%)                                       |                                                                                                  | 28 (10.6%)   | 0.35     |
| Mother educated to less than degree level               | 60 (14.2%)                                       | 52%                                                                                              | 118 (19.3%)  | 0.03     |
| Mother's age                                            |                                                  |                                                                                                  |              |          |
| <25 years                                               | 31 (7.4%)                                        | 52%                                                                                              | 84 (13.6%)   |          |
| 25 to <35 years                                         | 277 (65.6%)                                      |                                                                                                  | 359 (58.2%)  |          |
| ≥ 35 years                                              | 114 (27.0%)                                      |                                                                                                  | 174 (28.2%)  | 0.004    |
| NZ Deprivation Index 2006                               |                                                  |                                                                                                  |              |          |
| 1 ( <i>lowest deprivation</i> )                         | 109 (25.8%)                                      | 52%                                                                                              | 167 (27.1%)  |          |
| 2                                                       | 118 (28.0%)                                      |                                                                                                  | 127 (20.6%)  |          |
| 3                                                       | 84 (19.9%)                                       |                                                                                                  | 144 (23.4%)  |          |
| 4                                                       | 73 (17.3%)                                       |                                                                                                  | 103 (16.7%)  |          |
| 5 ( <i>highest deprivation</i> )                        | 38 (9.0%)                                        |                                                                                                  | 75 (12.2%)   | 0.05     |
| <b>Maternal, pregnancy and delivery characteristics</b> |                                                  |                                                                                                  |              |          |
| Maternal pre-pregnancy BMI                              |                                                  |                                                                                                  |              |          |
| <25 kg/m <sup>2</sup>                                   | 245 (58.1%)                                      | 49%                                                                                              | 331 (56.8%)  |          |
| 25 to <30 kg/m <sup>2</sup>                             | 113 (26.8%)                                      |                                                                                                  | 170 (29.2%)  |          |
| ≥30 kg/m <sup>2</sup>                                   | 64 (15.2%)                                       |                                                                                                  | 82 (14.1%)   | 0.68     |
| Mother did physical activity pre-pregnancy**            | 354 (83.9%)                                      | 52%                                                                                              | 506 (82.1%)  | 0.46     |
| Mother's diet in pregnancy                              |                                                  |                                                                                                  |              |          |
| <i>Processed foods (SD)</i>                             | -0.04 (1.02)                                     | 43%                                                                                              | 0.03 (1.02)  | 0.25     |
| <i>Snacks (SD)</i>                                      | -0.06 (1.00)                                     | 43%                                                                                              | 0.05 (1.00)  | 0.08     |
| <i>Healthy foods (SD)</i>                               | 0.07 (1.00)                                      | 43%                                                                                              | -0.06 (1.00) | 0.04     |
| <i>Sweet foods (SD)</i>                                 | 0.00 (0.98)                                      | 43%                                                                                              | 0.00 (1.02)  | 0.97     |
| <i>Starchy foods (SD)</i>                               | -0.01 (1.01)                                     | 43%                                                                                              | 0.01 (0.99)  | 0.77     |
| Hypertension in pregnancy                               | 50 (11.9%)                                       | 22%                                                                                              | 38 (14.6%)   | 0.32     |
| Diabetes in pregnancy                                   | 15 (3.6%)                                        | 22%                                                                                              | 11 (4.2%)    | 0.68     |
| <b>Infancy characteristics</b>                          |                                                  |                                                                                                  |              |          |
| Child's weight in first week (kg)                       | 3.54 (0.56)                                      | 21%                                                                                              | 3.49 (0.60)  | 0.27     |
| Child's weight at 3 months (kg)                         | 6.05 (0.89)                                      | 18%                                                                                              | 6.07 (0.88)  | 0.74     |
| Exclusive breastfeeding in first 3 days                 | 340 (80.6%)                                      | 22%                                                                                              | 203 (79.6%)  | 0.76     |
| Exclusive breastfeeding at 3 months                     | 225 (53.3%)                                      | 22%                                                                                              | 139 (53.1%)  | 0.95     |
| Solid foods introduced by 3 months                      | 125 (29.6%)                                      | 22%                                                                                              | 80 (30.8%)   | 0.75     |

\*P value testing the null hypothesis that the mean or percentage does not differ between those included in analyses and those excluded due to missing data; p values are generated from t-tests or chi-squared tests

\*\* Dietary pattern scores are standardised to have a mean of zero and variance of one; values in this table can therefore be interpreted as standard deviations from the overall population mean

**Supplementary Table 3. Principal component analysis of dietary data; first five principal components**

Values are 'eigenvectors' from rotated principal components, which can be interpreted as weights assigned to the food items within each dietary pattern. For example in the 'high fat, low fruit & veg, high sugar' dietary pattern, Pies has a large positive weight (0.2660) whereas fresh fruit has a low negative weight (-0.1158). Therefore the more often a woman reports eating pies, the higher her score for the 'high fat, low fruit & veg, high sugar' dietary pattern will be, and vice versa for fresh fruit.

|                                                | <i><b>Processed</b></i> | <i><b>Snacks</b></i> | <i><b>Healthy foods</b></i> | <i><b>Sweet foods</b></i> | <i><b>Starchy foods</b></i> |
|------------------------------------------------|-------------------------|----------------------|-----------------------------|---------------------------|-----------------------------|
| <i><b>Proportion of variance explained</b></i> | <i><b>0.10</b></i>      | <i><b>0.08</b></i>   | <i><b>0.07</b></i>          | <i><b>0.07</b></i>        | <i><b>0.06</b></i>          |
|                                                |                         |                      |                             |                           |                             |
| <b>Boiled veg</b>                              | -0.0550                 | -0.0904              | -0.0589                     | 0.0755                    | -0.0248                     |
| <b>Stir fry veg</b>                            | -0.1217                 | 0.2198               | 0.2764                      | -0.2163                   | 0.2529                      |
| <b>Frozen veg</b>                              | 0.0911                  | 0.0129               | 0.0001                      | -0.0106                   | -0.0811                     |
| <b>Fresh fruit</b>                             | 0.0679                  | 0.0136               | 0.3655                      | -0.0234                   | 0.1058                      |
| <b>Oats</b>                                    | -0.0790                 | 0.0568               | 0.3979                      | 0.1189                    | -0.0566                     |
| <b>European bread</b>                          | 0.0317                  | 0.0371               | -0.4535                     | 0.0586                    | 0.0806                      |
| <b>Brown bread</b>                             | 0.0881                  | -0.0550              | 0.4737                      | 0.0108                    | -0.1140                     |
| <b>Pulses</b>                                  | 0.0253                  | 0.0367               | 0.3548                      | -0.0153                   | 0.1480                      |
| <b>Cheese</b>                                  | 0.2632                  | -0.2813              | 0.1399                      | 0.3055                    | -0.0519                     |
| <b>Pies</b>                                    | 0.3346                  | 0.0332               | -0.0116                     | -0.0698                   | 0.0504                      |
| <b>Sausages</b>                                | 0.1386                  | -0.0734              | -0.0678                     | 0.0224                    | 0.0755                      |
| <b>Burgers</b>                                 | 0.3757                  | 0.0220               | 0.0536                      | -0.0711                   | -0.0577                     |
| <b>Pizza</b>                                   | 0.4259                  | -0.0897              | 0.0468                      | 0.0795                    | -0.0322                     |
| <b>Chips</b>                                   | 0.4604                  | 0.0833               | 0.0001                      | -0.0459                   | -0.0200                     |
| <b>Bbq foods</b>                               | -0.0287                 | -0.0053              | 0.0629                      | 0.0455                    | 0.0251                      |
| <b>Fried foods</b>                             | 0.3338                  | 0.0018               | -0.0840                     | 0.0254                    | 0.1339                      |
| <b>Rice</b>                                    | -0.0756                 | 0.0559               | -0.0245                     | -0.0691                   | 0.6786                      |
| <b>Pasta</b>                                   | 0.1135                  | -0.1401              | -0.0166                     | 0.1475                    | 0.5898                      |
| <b>Pudding</b>                                 | 0.0112                  | 0.0033               | -0.0354                     | 0.4921                    | 0.0070                      |
| <b>Biscuits</b>                                | -0.0365                 | 0.1113               | -0.0066                     | 0.4777                    | 0.0216                      |
| <b>Cake</b>                                    | -0.0372                 | 0.1240               | -0.0012                     | 0.4789                    | 0.0338                      |
| <b>Chocolate bars</b>                          | -0.0032                 | 0.4619               | -0.0749                     | 0.1158                    | -0.0653                     |
| <b>Chocolate</b>                               | -0.0133                 | 0.4698               | 0.1081                      | 0.1568                    | -0.0180                     |
| <b>Sweets</b>                                  | 0.0388                  | 0.4489               | -0.0015                     | 0.0042                    | -0.0318                     |
| <b>Crisps</b>                                  | 0.1951                  | 0.2895               | -0.0607                     | -0.0494                   | 0.1189                      |
| <b>Fizzy drinks</b>                            | 0.2126                  | 0.2514               | -0.0934                     | -0.2176                   | -0.0952                     |

**Supplementary Table 4. Association between child's ethnicity and socio-demographic variables in participants with complete data on all variables. N=422**

Values are odds ratios (95% confidence intervals) comparing Māori or Pacific children and Other Ethnicity children to European children.

|                                           | European<br>N=307 | Māori or Pacific<br>N=64        | Other<br>N=51                 |
|-------------------------------------------|-------------------|---------------------------------|-------------------------------|
| Mother educated to less than degree level | 1 (ref)           | 1.67 (0.84 to 3.28)<br>P=0.13   | 0.24 (0.06 to 1.04)<br>P=0.06 |
| Mother's age                              |                   |                                 |                               |
| <25 years                                 | 1 (ref)           | 2.65 (1.18 to 5.98)<br>P=0.02   | 0.28 (0.04 to 2.16)<br>P=0.22 |
| 25 to <35 years                           | 1 (ref)           | 1 (ref)                         | 1 (ref)                       |
| ≥ 35 years                                | 1 (ref)           | 0.50 (0.24 to 1.05)<br>P=0.07   | 0.76 (0.39 to 1.50)<br>P=0.43 |
| NZ Deprivation Index 2006                 |                   |                                 |                               |
| 1 (lowest deprivation)                    | 1 (ref)           | 1 (ref)                         | 1 (ref)                       |
| 2                                         | 1 (ref)           | 2.05 (0.83 to 5.08)<br>P=0.12   | 2.46 (1.02 to 5.95)<br>P=0.05 |
| 3                                         | 1 (ref)           | 2.48 (0.97 to 6.33)<br>P=0.06   | 1.91 (0.71 to 5.10)<br>P=0.20 |
| 4                                         | 1 (ref)           | 5.81 (2.38 to 14.18)<br>P<0.001 | 2.77 (1.02 to 7.51)<br>P=0.05 |
| 5 (highest deprivation)                   | 1 (ref)           | 3.13 (1.04 to 9.44)<br>P=0.04   | 2.24 (0.67 to 7.41)<br>P=0.19 |

**Supplementary Table 5. Association between child's ethnicity and known risk factors for later obesity in participants with complete data on all variables (unadjusted).**

**N=422**

Values are odds ratios or mean differences (95% confidence intervals) comparing Māori or Pacific children and Other Ethnicity children to European children.

|                                                                               | European<br>N=307 | Māori or Pacific<br>N=64         | Other<br>N=51                   |
|-------------------------------------------------------------------------------|-------------------|----------------------------------|---------------------------------|
| <b>Categorical risk factors; odds ratios and 95% confidence intervals</b>     |                   |                                  |                                 |
| Maternal pre-pregnancy BMI                                                    |                   |                                  |                                 |
| <25 kg/m <sup>2</sup>                                                         | 1 (ref)           | 1 (ref)                          | 1 (ref)                         |
| 25 to <30 kg/m <sup>2</sup>                                                   | 1 (ref)           | 1.28 (0.67 to 2.44)<br>P=0.46    | 1.32 (0.69 to 2.53)<br>P=0.40   |
| ≥30 kg/m <sup>2</sup>                                                         | 1 (ref)           | 2.16 (1.09 to 4.29)<br>P=0.03    | 0.56 (0.19 to 1.66)<br>P=0.30   |
| Mother did physical activity pre-pregnancy                                    | 1 (ref)           | 1.28 (0.59 to 2.74)<br>P=0.53    | 1.56 (0.64 to 3.86)<br>P=0.33   |
| Hypertension in pregnancy                                                     | 1 (ref)           | 1.59 (0.74 to 3.43)<br>P=0.24    | 1.60 (0.69 to 3.70)<br>P=0.27   |
| Diabetes in pregnancy                                                         | 1 (ref)           | 0.87 (0.19 to 4.01)<br>P=0.86    | 1.10 (0.24 to 5.11)<br>P=0.91   |
| Exclusive breastfeeding in first 3 days                                       | 1 (ref)           | 0.95 (0.49 to 1.86)<br>P=0.89    | 1.13 (0.52 to 2.46)<br>P=0.75   |
| Exclusive breastfeeding at 3 months                                           | 1 (ref)           | 0.98 (0.57 to 1.68)<br>P=0.94    | 1.55 (0.84 to 2.85)<br>P=0.16   |
| Solid foods introduced by 3 months                                            | 1 (ref)           | 1.42 (0.80 to 2.50)<br>P=0.23    | 1.05 (0.55 to 2.02)<br>P=0.88   |
| <b>Continuous risk factors; mean differences and 95% confidence intervals</b> |                   |                                  |                                 |
| Mother's diet in pregnancy*                                                   |                   |                                  |                                 |
| <i>Processed foods (SD)</i>                                                   | 0 (ref)           | 0.10 (-0.16 to 0.37)<br>P=0.44   | -0.10 (-0.39 to 0.18)<br>P=0.48 |
| <i>Snacks (SD)</i>                                                            | 0 (ref)           | 0.25 (-0.02 to 0.52)<br>P=0.07   | -0.18 (-0.48 to 0.11)<br>P=0.22 |
| <i>Healthy foods (SD)</i>                                                     | 0 (ref)           | -0.06 (-0.33 to 0.21)<br>P=0.65  | 0.09 (-0.21 to 0.39)<br>P=0.56  |
| <i>Sweet foods (SD)</i>                                                       | 0 (ref)           | -0.29 (-0.56 to -0.03)<br>P=0.03 | -0.01 (-0.30 to 0.28)<br>P=0.94 |
| <i>Starchy foods (SD)</i>                                                     | 0 (ref)           | 0.23 (-0.04 to 0.50)<br>P=0.10   | 0.40 (0.10 to 0.70)<br>P=0.01   |
| Child's weight in first week (kg)                                             | 0 (ref)           | 0.04 (-0.12 to 0.19)<br>P=0.64   | -0.11 (-0.27 to 0.06)<br>P=0.21 |
| Child's weight at 3 months (kg)                                               | 0 (ref)           | 0.13 (-0.11 to 0.37)<br>P=0.30   | 0.04 (-0.23 to 0.30)<br>P=0.79  |

\* Dietary pattern scores are standardised to have a mean of zero and variance of one; values in this table can therefore be interpreted as standard deviations from the overall population mean

**Supplementary Table 6. Association between child's ethnicity and known risk factors for later obesity in participants with complete data on all variables (with adjustment for socio-demographic characteristics). N=422**

Values are odds ratios or mean differences (95% confidence intervals) comparing Māori or Pacific children and Other Ethnicity children to European children.

|                                                                               | European<br>N=307 | Māori or Pacific<br>N=64        | Other<br>N=51                   |
|-------------------------------------------------------------------------------|-------------------|---------------------------------|---------------------------------|
| <b>Categorical risk factors; odds ratios and 95% confidence intervals</b>     |                   |                                 |                                 |
| Maternal pre-pregnancy BMI                                                    |                   |                                 |                                 |
| <25 kg/m <sup>2</sup>                                                         | 1 (ref)           | 1 (ref)                         | 1 (ref)                         |
| 25 to <30 kg/m <sup>2</sup>                                                   | 1 (ref)           | 1.22 (0.62 to 2.38)<br>P=0.56   | 1.33 (0.68 to 2.57)<br>P=0.40   |
| ≥30 kg/m <sup>2</sup>                                                         | 1 (ref)           | 2.06 (0.99 to 4.28)<br>P=0.05   | 0.57 (0.19 to 1.73)<br>P=0.32   |
| Mother did physical activity pre-pregnancy                                    | 1 (ref)           | 1.79 (0.79 to 4.06)<br>P=0.17   | 1.57 (0.63 to 3.94)<br>P=0.34   |
| Hypertension in pregnancy                                                     | 1 (ref)           | 1.71 (0.76 to 3.82)<br>P=0.19   | 1.63 (0.69 to 3.84)<br>P=0.26   |
| Diabetes in pregnancy                                                         | 1 (ref)           | 0.87 (0.18 to 4.25)<br>P=0.86   | 1.06 (0.22 to 5.08)<br>P=0.94   |
| Exclusive breastfeeding in first 3 days                                       | 1 (ref)           | 0.93 (0.46 to 1.87)<br>P=0.84   | 1.18 (0.54 to 2.58)<br>P=0.68   |
| Exclusive breastfeeding at 3 months                                           | 1 (ref)           | 0.98 (0.56 to 1.72)<br>P=0.95   | 1.52 (0.82 to 2.82)<br>P=0.19   |
| Solid foods introduced by 3 months                                            | 1 (ref)           | 1.46 (0.80 to 2.64)<br>P=0.22   | 1.16 (0.60 to 2.25)<br>P=0.66   |
| <b>Continuous risk factors; mean differences and 95% confidence intervals</b> |                   |                                 |                                 |
| Mother's diet in pregnancy*                                                   |                   |                                 |                                 |
| <i>Processed foods (SD)</i>                                                   | 0 (ref)           | 0.02 (-0.25 to 0.29)<br>P=0.89  | -0.12 (-0.41 to 0.17)<br>P=0.42 |
| <i>Snacks (SD)</i>                                                            | 0 (ref)           | 0.24 (-0.03 to 0.52)<br>P=0.08  | -0.22 (-0.51 to 0.08)<br>P=0.15 |
| <i>Healthy foods (SD)</i>                                                     | 0 (ref)           | -0.01 (-0.29 to 0.27)<br>P=0.92 | 0.09 (-0.21 to 0.39)<br>P=0.55  |
| <i>Sweet foods (SD)</i>                                                       | 0 (ref)           | -0.26 (-0.53 to 0.01)<br>P=0.06 | -0.03 (-0.32 to 0.26)<br>P=0.82 |
| <i>Starchy foods (SD)</i>                                                     | 0 (ref)           | 0.26 (-0.02 to 0.54)<br>P=0.07  | 0.38 (0.08 to 0.68)<br>P=0.01   |
| Child's weight in first week (kg)                                             | 0 (ref)           | 0.03 (-0.13 to 0.19)<br>P=0.73  | -0.09 (-0.26 to 0.08)<br>P=0.28 |
| Child's weight at 3 months (kg)                                               | 0 (ref)           | 0.11 (-0.14 to 0.36)<br>P=0.40  | 0.05 (-0.22 to 0.32)<br>P=0.73  |

\* Dietary pattern scores are standardised to have a mean of zero and variance of one; values in this table can therefore be interpreted as standard deviations from the overall population mean

**Supplementary Table 7. Association between ethnicity and infant weight at age 3 months, and the degree to which this is explained by other risk factors in participants with complete data on all variables. N=422**

Values are mean differences (95% confidence intervals) in infant weight at age 3 months (kg) from linear regression, comparing each ethnic group with the reference category, European ethnicity

|                                                         | Mean difference (95% CI) in infant weight at 3 months (kg) |                                |                                |
|---------------------------------------------------------|------------------------------------------------------------|--------------------------------|--------------------------------|
|                                                         | European<br>N=493                                          | Māori or Pacific<br>N=115      | Other<br>N=79                  |
| <i>Unadjusted</i>                                       | 0 (ref)                                                    | 0.13 (-0.11 to 0.37)<br>P=0.30 | 0.04 (-0.23 to 0.30)<br>P=0.79 |
| <i>Adjusted for socio-demographic variables*</i>        | 0 (ref)                                                    | 0.11 (-0.14 to 0.36)<br>P=0.40 | 0.05 (-0.22 to 0.32)<br>P=0.73 |
| <i>Adjusted for maternal pre-pregnancy BMI</i>          | 0 (ref)                                                    | 0.12 (-0.12 to 0.36)<br>P=0.34 | 0.04 (-0.22 to 0.31)<br>P=0.76 |
| <i>Adjusted for maternal dietary pattern scores**</i>   | 0 (ref)                                                    | 0.14 (-0.10 to 0.39)<br>P=0.25 | 0.02 (-0.25 to 0.29)<br>P=0.89 |
| <i>Adjusted for all measured potential mediators***</i> | 0 (ref)                                                    | 0.09 (-0.16 to 0.33)<br>P=0.50 | 0.02 (-0.26 to 0.27)<br>P=0.99 |

\* Adjusted for maternal education, maternal age and NZ deprivation index

\*\* Adjusted for scores for all five dietary patterns

\*\*\* adjusted for maternal education, maternal age, NZ deprivation index, maternal pre-pregnancy BMI, scores for all five dietary patterns, hypertension during pregnancy, diabetes during pregnancy, physical activity during pregnancy, exclusive breastfeeding at 3 days, exclusive breastfeeding at 3 months, and early introduction of solid foods

**Supplementary Figure 1. Screeplot of Eigenvalues after PCA of dietary data**

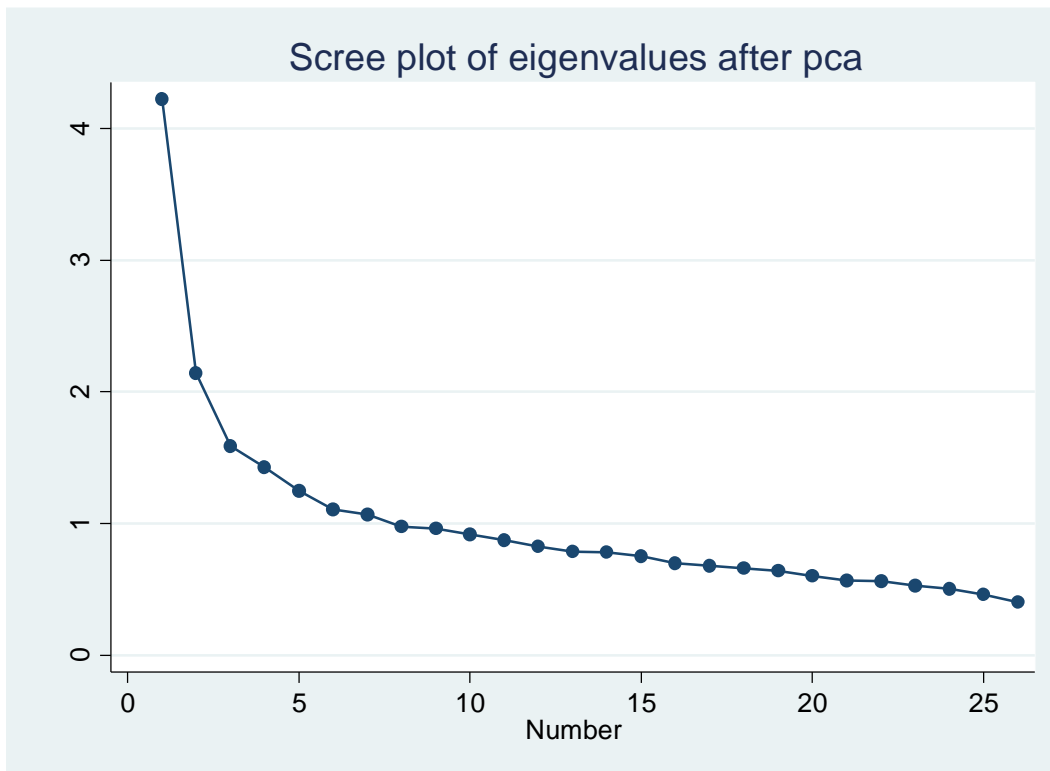

Dietary intake questionnaire used in the ELF study

**Diet**

**7.06 Since becoming pregnant, how many times a week do you eat?**

|                                                 | Never<br>or<br>rarely    | Once<br>in<br>2<br>weeks | 1-3<br>times<br>a<br>week | 4-7<br>times<br>a<br>week | More<br>than<br>once a<br>day |
|-------------------------------------------------|--------------------------|--------------------------|---------------------------|---------------------------|-------------------------------|
| Poultry<br><i>EXAMPLE: Chicken, turkey</i>      | <input type="checkbox"/> | <input type="checkbox"/> | <input type="checkbox"/>  | <input type="checkbox"/>  | <input type="checkbox"/>      |
| Eggs                                            | <input type="checkbox"/> | <input type="checkbox"/> | <input type="checkbox"/>  | <input type="checkbox"/>  | <input type="checkbox"/>      |
| Liver, pate, kidney, heart                      | <input type="checkbox"/> | <input type="checkbox"/> | <input type="checkbox"/>  | <input type="checkbox"/>  | <input type="checkbox"/>      |
| White fish<br><i>EXAMPLE: Cod, fish fingers</i> | <input type="checkbox"/> | <input type="checkbox"/> | <input type="checkbox"/>  | <input type="checkbox"/>  | <input type="checkbox"/>      |
| Other Fish<br><i>EXAMPLE: Tuna, mackerel</i>    | <input type="checkbox"/> | <input type="checkbox"/> | <input type="checkbox"/>  | <input type="checkbox"/>  | <input type="checkbox"/>      |
| Shellfish                                       | <input type="checkbox"/> | <input type="checkbox"/> | <input type="checkbox"/>  | <input type="checkbox"/>  | <input type="checkbox"/>      |

**7.06 (a) Do you eat the fat on meat?**

|                 |                          |
|-----------------|--------------------------|
| Yes, all of it  | <input type="checkbox"/> |
| Yes, some of it | <input type="checkbox"/> |
| No              | <input type="checkbox"/> |
| Never eat meat  | <input type="checkbox"/> |

**7.07 Since becoming pregnant what sort of 'spreads' and 'sauces' do you use?**

|                                  | Yes                      | No                       |
|----------------------------------|--------------------------|--------------------------|
| Butter                           | <input type="checkbox"/> | <input type="checkbox"/> |
| Unsalted butter                  | <input type="checkbox"/> | <input type="checkbox"/> |
| Polyunsaturated margarine        | <input type="checkbox"/> | <input type="checkbox"/> |
| EXAMPLE: <i>Flora, sunflower</i> |                          |                          |
| Butter and margarine blend       | <input type="checkbox"/> | <input type="checkbox"/> |
| Olive oil spread                 | <input type="checkbox"/> | <input type="checkbox"/> |
| EXAMPLE: <i>Olivio</i>           |                          |                          |
| Low salt margarine               | <input type="checkbox"/> | <input type="checkbox"/> |
| Reduced fat margarines           | <input type="checkbox"/> | <input type="checkbox"/> |
| Nutella                          | <input type="checkbox"/> | <input type="checkbox"/> |
| Jam/honey                        | <input type="checkbox"/> | <input type="checkbox"/> |
| Marmite/vegemite                 | <input type="checkbox"/> | <input type="checkbox"/> |
| Peanut butter                    | <input type="checkbox"/> | <input type="checkbox"/> |
| Mayonnaise/salad dressing        | <input type="checkbox"/> | <input type="checkbox"/> |
| Tomato sauce/ketchup             | <input type="checkbox"/> | <input type="checkbox"/> |
| Gravy                            | <input type="checkbox"/> | <input type="checkbox"/> |
| Other spreads/sauces             | <input type="checkbox"/> | <input type="checkbox"/> |

Please describe \_\_\_\_\_

**7.08 Since becoming pregnant what sort of fat do you mainly use for frying, cooking or BBQ?**

|                                           | Yes                      | No                       |
|-------------------------------------------|--------------------------|--------------------------|
| Butter, dripping, lard, solid cooking fat | <input type="checkbox"/> | <input type="checkbox"/> |
| Polyunsaturated margarine                 | <input type="checkbox"/> | <input type="checkbox"/> |
| EXAMPLE: <i>Flora, Sunflower, Olivio</i>  |                          |                          |
| Sesame seed oil                           | <input type="checkbox"/> | <input type="checkbox"/> |
| Sunflower, soya, corn, olive oil          | <input type="checkbox"/> | <input type="checkbox"/> |
| Other vegetable oil                       | <input type="checkbox"/> | <input type="checkbox"/> |
| Other                                     | <input type="checkbox"/> | <input type="checkbox"/> |

Please describe \_\_\_\_\_

**Vegetables & Fruit**

**7.09 Since becoming pregnant, how many times a week do you eat?**

|                                                               | Never<br>or<br>rarely    | Once<br>in<br>2<br>weeks | 1-3<br>times<br>a<br>week | 4-7<br>times<br>a<br>week | More<br>than<br>once a<br>day |
|---------------------------------------------------------------|--------------------------|--------------------------|---------------------------|---------------------------|-------------------------------|
| Baked beans                                                   | <input type="checkbox"/> | <input type="checkbox"/> | <input type="checkbox"/>  | <input type="checkbox"/>  | <input type="checkbox"/>      |
| Peas, sweetcorn, broad beans                                  | <input type="checkbox"/> | <input type="checkbox"/> | <input type="checkbox"/>  | <input type="checkbox"/>  | <input type="checkbox"/>      |
| Cabbage, brussel sprouts, kale & other green leafy vegetables | <input type="checkbox"/> | <input type="checkbox"/> | <input type="checkbox"/>  | <input type="checkbox"/>  | <input type="checkbox"/>      |
| Other green vegetables                                        | <input type="checkbox"/> | <input type="checkbox"/> | <input type="checkbox"/>  | <input type="checkbox"/>  | <input type="checkbox"/>      |
| EXAMPLE: <i>Cauliflower, runner beans, leeks</i>              |                          |                          |                           |                           |                               |
| Carrots                                                       | <input type="checkbox"/> | <input type="checkbox"/> | <input type="checkbox"/>  | <input type="checkbox"/>  | <input type="checkbox"/>      |
| Potatoes                                                      | <input type="checkbox"/> | <input type="checkbox"/> | <input type="checkbox"/>  | <input type="checkbox"/>  | <input type="checkbox"/>      |

|                                                         |                          |                          |                          |                          |                          |
|---------------------------------------------------------|--------------------------|--------------------------|--------------------------|--------------------------|--------------------------|
| Other root vegetables                                   | <input type="checkbox"/> |
| <i>EXAMPLE: Turnip, swede, parsnip</i>                  |                          |                          |                          |                          |                          |
| Salad                                                   | <input type="checkbox"/> |
| <i>EXAMPLE: Lettuce, tomatoes, cucumber, etc</i>        |                          |                          |                          |                          |                          |
| Boiled vegetables                                       | <input type="checkbox"/> |
| Stir-fried vegetables                                   | <input type="checkbox"/> |
| Frozen vegetables                                       | <input type="checkbox"/> |
| Processed fruit                                         | <input type="checkbox"/> |
| Frozen fruit                                            | <input type="checkbox"/> |
| Fresh fruit                                             | <input type="checkbox"/> |
| <i>EXAMPLE: Apple, pear, banana, orange, grapes etc</i> |                          |                          |                          |                          |                          |
| Other fruit/veges not listed                            | <input type="checkbox"/> |

## Grains

|                                                                   |                                                                   |                                    |                                     |                                     |                                         |
|-------------------------------------------------------------------|-------------------------------------------------------------------|------------------------------------|-------------------------------------|-------------------------------------|-----------------------------------------|
| <b>7.10</b>                                                       | <b>Since becoming pregnant, how many times a week do you eat?</b> |                                    |                                     |                                     |                                         |
|                                                                   | <b>Never<br/>or<br/>rarely</b>                                    | <b>Once<br/>in<br/>2<br/>weeks</b> | <b>1-3<br/>times<br/>a<br/>week</b> | <b>4-7<br/>times<br/>a<br/>week</b> | <b>More<br/>than<br/>once a<br/>day</b> |
| Oat cereals                                                       | <input type="checkbox"/>                                          | <input type="checkbox"/>           | <input type="checkbox"/>            | <input type="checkbox"/>            | <input type="checkbox"/>                |
| <i>EXAMPLE: Porridge, muesli</i>                                  |                                                                   |                                    |                                     |                                     |                                         |
| Wholegrain/bran cereals                                           | <input type="checkbox"/>                                          | <input type="checkbox"/>           | <input type="checkbox"/>            | <input type="checkbox"/>            | <input type="checkbox"/>                |
| <i>EXAMPLE: Weetbix, All Bran, Bran Flakes, Fruit &amp; Fibre</i> |                                                                   |                                    |                                     |                                     |                                         |
| Other cereals                                                     | <input type="checkbox"/>                                          | <input type="checkbox"/>           | <input type="checkbox"/>            | <input type="checkbox"/>            | <input type="checkbox"/>                |
| <i>EXAMPLE: Cornflakes, Rice bubbles, Special K</i>               |                                                                   |                                    |                                     |                                     |                                         |

**7.11 Since becoming pregnant, how many pieces of bread, rolls, chappatis & pita bread do you eat on a usual day?**

|             |                          |
|-------------|--------------------------|
| Less than 1 | <input type="checkbox"/> |
| 1-2         | <input type="checkbox"/> |
| 3-4         | <input type="checkbox"/> |
| 5 or more   | <input type="checkbox"/> |

**7.12 What types of bread do you eat most days?**

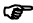 *Multiple answers possible*

|                              | Yes                      | No                       | Don't know               |
|------------------------------|--------------------------|--------------------------|--------------------------|
| White bread                  | <input type="checkbox"/> | <input type="checkbox"/> | <input type="checkbox"/> |
| Brown/granary bread          | <input type="checkbox"/> | <input type="checkbox"/> | <input type="checkbox"/> |
| Wholemeal bread              | <input type="checkbox"/> | <input type="checkbox"/> | <input type="checkbox"/> |
| Chappatis, Nan bread         | <input type="checkbox"/> | <input type="checkbox"/> | <input type="checkbox"/> |
| Other types                  | <input type="checkbox"/> | <input type="checkbox"/> | <input type="checkbox"/> |
| <i>Please describe</i> _____ |                          |                          |                          |
| Don't usually eat any bread  | <input type="checkbox"/> | <input type="checkbox"/> | <input type="checkbox"/> |

Legumes

7.13 Since becoming pregnant, how many times a week do you eat?

|                                                                   | Never<br>or<br>rarely    | Once<br>in<br>2<br>weeks | 1-3<br>times<br>a<br>week | 4-7<br>times<br>a<br>week | More<br>than<br>once a<br>day |
|-------------------------------------------------------------------|--------------------------|--------------------------|---------------------------|---------------------------|-------------------------------|
| Pulses                                                            | <input type="checkbox"/> | <input type="checkbox"/> | <input type="checkbox"/>  | <input type="checkbox"/>  | <input type="checkbox"/>      |
| EXAMPLE: <i>Dried beans, lentils</i>                              |                          |                          |                           |                           |                               |
| Nuts, nut roast                                                   | <input type="checkbox"/> | <input type="checkbox"/> | <input type="checkbox"/>  | <input type="checkbox"/>  | <input type="checkbox"/>      |
| Bean curd (tofu)                                                  | <input type="checkbox"/> | <input type="checkbox"/> | <input type="checkbox"/>  | <input type="checkbox"/>  | <input type="checkbox"/>      |
| Tahini                                                            | <input type="checkbox"/> | <input type="checkbox"/> | <input type="checkbox"/>  | <input type="checkbox"/>  | <input type="checkbox"/>      |
| EXAMPLE: <i>Used to make hummus, almond butter, peanut butter</i> |                          |                          |                           |                           |                               |
| Soya meat, vegeburgers                                            | <input type="checkbox"/> | <input type="checkbox"/> | <input type="checkbox"/>  | <input type="checkbox"/>  | <input type="checkbox"/>      |
| Other legumes not listed                                          | <input type="checkbox"/> | <input type="checkbox"/> | <input type="checkbox"/>  | <input type="checkbox"/>  | <input type="checkbox"/>      |

Dairy Food

7.14 Since becoming pregnant, how often have you eaten the following?

|                                  | Never                    | Less than once a week    | 1-6 times a week         | More than 6 times a week | Don't know               |
|----------------------------------|--------------------------|--------------------------|--------------------------|--------------------------|--------------------------|
| Yoghurt (Full)                   | <input type="checkbox"/> |
| Yoghurt (Lite)                   | <input type="checkbox"/> |
| Yoghurt (Low fat)                | <input type="checkbox"/> |
| Cream (Full)                     | <input type="checkbox"/> |
| Cream (Lite)                     | <input type="checkbox"/> |
| Cream Cheese (Full)              | <input type="checkbox"/> |
| Cheese                           | <input type="checkbox"/> |
| EXAMPLE: <i>Edam, mozzarella</i> |                          |                          |                          |                          |                          |

7.15 Do you drink milk?

Yes

☐

➔

IF 'YES' PLEASE GO TO QUESTION 7.15(a)

No

☐

➔

IF 'NO' PLEASE GO TO QUESTION 7.16

**7.15**  
**(a) What type of milks do you drink?**

|                                  | Usually                  | Some times               | Not at all               | Don't know               |
|----------------------------------|--------------------------|--------------------------|--------------------------|--------------------------|
| Silver top (Full cream)          | <input type="checkbox"/> | <input type="checkbox"/> | <input type="checkbox"/> | <input type="checkbox"/> |
| Blue top (Common)                | <input type="checkbox"/> | <input type="checkbox"/> | <input type="checkbox"/> | <input type="checkbox"/> |
| Light Blue top (Lite)            | <input type="checkbox"/> | <input type="checkbox"/> | <input type="checkbox"/> | <input type="checkbox"/> |
| Dark Green top (Super trim)      | <input type="checkbox"/> | <input type="checkbox"/> | <input type="checkbox"/> | <input type="checkbox"/> |
| Orange top (Vitamin A & D)       | <input type="checkbox"/> | <input type="checkbox"/> | <input type="checkbox"/> | <input type="checkbox"/> |
| Yellow top (Extra calcium)       | <input type="checkbox"/> | <input type="checkbox"/> | <input type="checkbox"/> | <input type="checkbox"/> |
| Purple top (Omega 3 & Vitamin E) | <input type="checkbox"/> | <input type="checkbox"/> | <input type="checkbox"/> | <input type="checkbox"/> |
| Soya milk                        | <input type="checkbox"/> | <input type="checkbox"/> | <input type="checkbox"/> | <input type="checkbox"/> |
| Rice milk                        | <input type="checkbox"/> | <input type="checkbox"/> | <input type="checkbox"/> | <input type="checkbox"/> |
| Goat/sheep milk                  | <input type="checkbox"/> | <input type="checkbox"/> | <input type="checkbox"/> | <input type="checkbox"/> |
| Milk powder                      | <input type="checkbox"/> | <input type="checkbox"/> | <input type="checkbox"/> | <input type="checkbox"/> |
| Other                            | <input type="checkbox"/> | <input type="checkbox"/> | <input type="checkbox"/> | <input type="checkbox"/> |

**7.16 Since becoming pregnant, do you drink fresh milk directly from a farm?**

Yes ☐ → IF 'YES' PLEASE GO TO QUESTION 7.16(a)

No ☐ → IF 'NO' PLEASE GO TO QUESTION 7.17

**7.16**  
**(a) Do you normally boil this milk?**

Yes

☐

No

☐

7.16

(b)

Since becoming pregnant, how many glasses of fresh milk directly from a farm have you drunk?

Glass per week

## Other Food

7.17 Since becoming pregnant, how many times a week do you eat?

|                                                    | Never<br>or<br>rarely    | Once<br>in<br>2<br>weeks | 1-3<br>times<br>a<br>week | 4-7<br>times<br>a<br>week | More<br>than<br>once a<br>day |
|----------------------------------------------------|--------------------------|--------------------------|---------------------------|---------------------------|-------------------------------|
| Pies, pasties                                      | <input type="checkbox"/> | <input type="checkbox"/> | <input type="checkbox"/>  | <input type="checkbox"/>  | <input type="checkbox"/>      |
| EXAMPLE: <i>Pork, steak, meat</i>                  |                          |                          |                           |                           |                               |
| Sausages                                           | <input type="checkbox"/> | <input type="checkbox"/> | <input type="checkbox"/>  | <input type="checkbox"/>  | <input type="checkbox"/>      |
| Hamburgers                                         | <input type="checkbox"/> | <input type="checkbox"/> | <input type="checkbox"/>  | <input type="checkbox"/>  | <input type="checkbox"/>      |
| Pizza                                              | <input type="checkbox"/> | <input type="checkbox"/> | <input type="checkbox"/>  | <input type="checkbox"/>  | <input type="checkbox"/>      |
| Chips/fries                                        | <input type="checkbox"/> | <input type="checkbox"/> | <input type="checkbox"/>  | <input type="checkbox"/>  | <input type="checkbox"/>      |
| BBQ food                                           | <input type="checkbox"/> | <input type="checkbox"/> | <input type="checkbox"/>  | <input type="checkbox"/>  | <input type="checkbox"/>      |
| Fried food                                         | <input type="checkbox"/> | <input type="checkbox"/> | <input type="checkbox"/>  | <input type="checkbox"/>  | <input type="checkbox"/>      |
| EXAMPLE: <i>Fried fish, eggs, bacon, chops etc</i> |                          |                          |                           |                           |                               |
| Roast potatoes (Cooked in fat)                     | <input type="checkbox"/> | <input type="checkbox"/> | <input type="checkbox"/>  | <input type="checkbox"/>  | <input type="checkbox"/>      |
| Boiled/mashed potatoes                             | <input type="checkbox"/> | <input type="checkbox"/> | <input type="checkbox"/>  | <input type="checkbox"/>  | <input type="checkbox"/>      |
| Rice (Boiled)                                      | <input type="checkbox"/> | <input type="checkbox"/> | <input type="checkbox"/>  | <input type="checkbox"/>  | <input type="checkbox"/>      |
| Pasta                                              | <input type="checkbox"/> | <input type="checkbox"/> | <input type="checkbox"/>  | <input type="checkbox"/>  | <input type="checkbox"/>      |

EXAMPLE: *Spaghetti, noodles*

Other food not listed

|                          |                          |                          |                          |                          |
|--------------------------|--------------------------|--------------------------|--------------------------|--------------------------|
| <input type="checkbox"/> |
|--------------------------|--------------------------|--------------------------|--------------------------|--------------------------|

## Snacks

**7.18** Since becoming pregnant, how many times a week do you eat?

|                                                                                   | Never<br>or<br>rarely    | Once<br>in<br>2<br>weeks | 1-3<br>times<br>a<br>week | 4-7<br>times<br>a<br>week | More<br>than<br>once a<br>day |
|-----------------------------------------------------------------------------------|--------------------------|--------------------------|---------------------------|---------------------------|-------------------------------|
| Pudding                                                                           | <input type="checkbox"/> | <input type="checkbox"/> | <input type="checkbox"/>  | <input type="checkbox"/>  | <input type="checkbox"/>      |
| EXAMPLE: <i>Fruit pie, crumble, cheese-cake, mousse, gateaux</i>                  |                          |                          |                           |                           |                               |
| Biscuits                                                                          | <input type="checkbox"/> | <input type="checkbox"/> | <input type="checkbox"/>  | <input type="checkbox"/>  | <input type="checkbox"/>      |
| EXAMPLE: <i>Digestives, shortbread, gingernuts, chocolate biscuits</i>            |                          |                          |                           |                           |                               |
| Cripbreads                                                                        | <input type="checkbox"/> | <input type="checkbox"/> | <input type="checkbox"/>  | <input type="checkbox"/>  | <input type="checkbox"/>      |
| EXAMPLE: <i>Ryvita, cabin bread</i>                                               |                          |                          |                           |                           |                               |
| Cakes or buns                                                                     | <input type="checkbox"/> | <input type="checkbox"/> | <input type="checkbox"/>  | <input type="checkbox"/>  | <input type="checkbox"/>      |
| EXAMPLE: <i>Fruit cake, sponge, teacake, buns, doughnuts, scones, custard pie</i> |                          |                          |                           |                           |                               |
| Chocolate bars                                                                    | <input type="checkbox"/> | <input type="checkbox"/> | <input type="checkbox"/>  | <input type="checkbox"/>  | <input type="checkbox"/>      |
| EXAMPLE: <i>Mars, Twix, Moro, Picnic, Bounty, Crunchie</i>                        |                          |                          |                           |                           |                               |
| Chocolate                                                                         | <input type="checkbox"/> | <input type="checkbox"/> | <input type="checkbox"/>  | <input type="checkbox"/>  | <input type="checkbox"/>      |
| EXAMPLE: <i>Dairy milk, plain, dark, nut, fruit, filled</i>                       |                          |                          |                           |                           |                               |
| Sweets                                                                            | <input type="checkbox"/> | <input type="checkbox"/> | <input type="checkbox"/>  | <input type="checkbox"/>  | <input type="checkbox"/>      |
| EXAMPLE: <i>Boiled lollies, toffees</i>                                           |                          |                          |                           |                           |                               |
| Crisps/potato chips                                                               | <input type="checkbox"/> | <input type="checkbox"/> | <input type="checkbox"/>  | <input type="checkbox"/>  | <input type="checkbox"/>      |
| Other snacks not listed                                                           | <input type="checkbox"/> | <input type="checkbox"/> | <input type="checkbox"/>  | <input type="checkbox"/>  | <input type="checkbox"/>      |

**7.19 How many times a week do you eat take-away foods for your main meals?**

Never or rarely

☐

1-2

☐

3-4

☐

5 or more

☐

10 or more

☐

**Seasoning**

**7.20 When you are eating, do you regularly add:**

|                         | Never                    | Rarely                   | Often                    | Always                   |
|-------------------------|--------------------------|--------------------------|--------------------------|--------------------------|
| Pepper                  | <input type="checkbox"/> | <input type="checkbox"/> | <input type="checkbox"/> | <input type="checkbox"/> |
| Salt (Table)            | <input type="checkbox"/> | <input type="checkbox"/> | <input type="checkbox"/> | <input type="checkbox"/> |
| Salt (Rock)             | <input type="checkbox"/> | <input type="checkbox"/> | <input type="checkbox"/> | <input type="checkbox"/> |
| Cheese                  | <input type="checkbox"/> | <input type="checkbox"/> | <input type="checkbox"/> | <input type="checkbox"/> |
| Oil                     | <input type="checkbox"/> | <input type="checkbox"/> | <input type="checkbox"/> | <input type="checkbox"/> |
| Soya sauces             | <input type="checkbox"/> | <input type="checkbox"/> | <input type="checkbox"/> | <input type="checkbox"/> |
| Other sauces            | <input type="checkbox"/> | <input type="checkbox"/> | <input type="checkbox"/> | <input type="checkbox"/> |
| Other spices/condiments | <input type="checkbox"/> | <input type="checkbox"/> | <input type="checkbox"/> | <input type="checkbox"/> |

*EXAMPLE: Brewer's yeast, sea kelp granules, fresh herbs*

Drinks

7.21 Since becoming pregnant, how many times a week do you drink?

|                                                                                    | Never<br>or<br>rarely    | Once<br>in<br>2<br>weeks | 1-3<br>times<br>a<br>week | 4-7<br>times<br>a<br>week | More<br>than<br>once a<br>day |
|------------------------------------------------------------------------------------|--------------------------|--------------------------|---------------------------|---------------------------|-------------------------------|
| Fizzy drinks (In a can)<br><i>EXAMPLE: L&amp;P, Sprite, Coca Cola</i>              | <input type="checkbox"/> | <input type="checkbox"/> | <input type="checkbox"/>  | <input type="checkbox"/>  | <input type="checkbox"/>      |
| Fizzy drinks (In a bottle)<br><i>EXAMPLE: L&amp;P, Sprite, Coca Cola</i>           | <input type="checkbox"/> | <input type="checkbox"/> | <input type="checkbox"/>  | <input type="checkbox"/>  | <input type="checkbox"/>      |
| Bottled juice<br><i>EXAMPLE: Keri juice</i>                                        | <input type="checkbox"/> | <input type="checkbox"/> | <input type="checkbox"/>  | <input type="checkbox"/>  | <input type="checkbox"/>      |
| Juice in a carton<br><i>EXAMPLE: Just Juice, Fresh up, Ribena</i>                  | <input type="checkbox"/> | <input type="checkbox"/> | <input type="checkbox"/>  | <input type="checkbox"/>  | <input type="checkbox"/>      |
| Water                                                                              | <input type="checkbox"/> | <input type="checkbox"/> | <input type="checkbox"/>  | <input type="checkbox"/>  | <input type="checkbox"/>      |
| Water (Carbonated)<br><i>EXAMPLE: Spring water, H<sub>2</sub>O sparkling drink</i> | <input type="checkbox"/> | <input type="checkbox"/> | <input type="checkbox"/>  | <input type="checkbox"/>  | <input type="checkbox"/>      |
| Tea                                                                                | <input type="checkbox"/> | <input type="checkbox"/> | <input type="checkbox"/>  | <input type="checkbox"/>  | <input type="checkbox"/>      |
| Herbal teas (Non caffeine)                                                         | <input type="checkbox"/> | <input type="checkbox"/> | <input type="checkbox"/>  | <input type="checkbox"/>  | <input type="checkbox"/>      |
| Coffee                                                                             | <input type="checkbox"/> | <input type="checkbox"/> | <input type="checkbox"/>  | <input type="checkbox"/>  | <input type="checkbox"/>      |
| Other drinks not listed                                                            | <input type="checkbox"/> | <input type="checkbox"/> | <input type="checkbox"/>  | <input type="checkbox"/>  | <input type="checkbox"/>      |

7.22 Do you regularly drink tea?

|     |                      |   |                                        |
|-----|----------------------|---|----------------------------------------|
| Yes | <input type="text"/> | → | IF 'YES' PLEASE GO TO QUESTION 7.22(a) |
| No  | <input type="text"/> | → | IF 'NO' PLEASE GO TO QUESTION 7.23     |

**7.22**  
**(a)** How many cups of tea do you drink in a day?

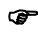 Do not include Herbal teas

Cups

**7.22**  
**(b)** How many cups of tea you drink each day are decaffeinated?

Cups

**7.23** Do you regularly drink coffee?

|     |                      |   |                                        |
|-----|----------------------|---|----------------------------------------|
| Yes | <input type="text"/> | → | IF 'YES' PLEASE GO TO QUESTION 7.23(a) |
| No  | <input type="text"/> | → | IF 'NO' PLEASE GO TO QUESTION 7.24     |

**7.23**  
**(a)** How many cups of decaffeinated coffee do you drink in a day?

Cups

**7.23**  
**(b)** How many cups of instant coffee do you drink each day?

Cups

**7.23**  
**(c)** How many cups of real coffee do you drink each day?

Cups

**7.24 How many teaspoons or honey or sugar do you add to hot drinks?**

Never or rarely

☐

1-2

☐

3-4

☐

5 or more

☐

**7.25 Do you drink Herbal teas at all?**

Yes, sometimes or always

☐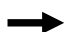

**IF 'YES' PLEASE GO TO QUESTION 7.25(a)**

No, not at all

☐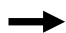

**IF 'NO' PLEASE GO TO QUESTION 7.26**

**7.25 What do you drink?  
(a)**

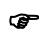 *Give exact name if you can*

---

---

**7.25 In which Trimester period?  
(b)**

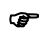 *Multiple answers possible*

1<sup>st</sup> Trimester (ie 1<sup>st</sup> 3 months)

☐

2<sup>nd</sup> Trimester (ie 2<sup>nd</sup> 3 months)

☐

3<sup>rd</sup> Trimester (ie 3<sup>rd</sup> 3 months)

☐

7.25  
(c)

How many times a day did you drink this tea?

Times
